# Supplementary material for: Seroepidemiology of Measles, Mumps and Rubella on Bonaire, St. Eustatius and Saba: The First Population-Based Serosurveillance Study in Caribbean Netherlands
Source: MDPI journal article supplement (doi:10.3390/vaccines7040137), 2019-10-01
Supplement: s1 [file s1]

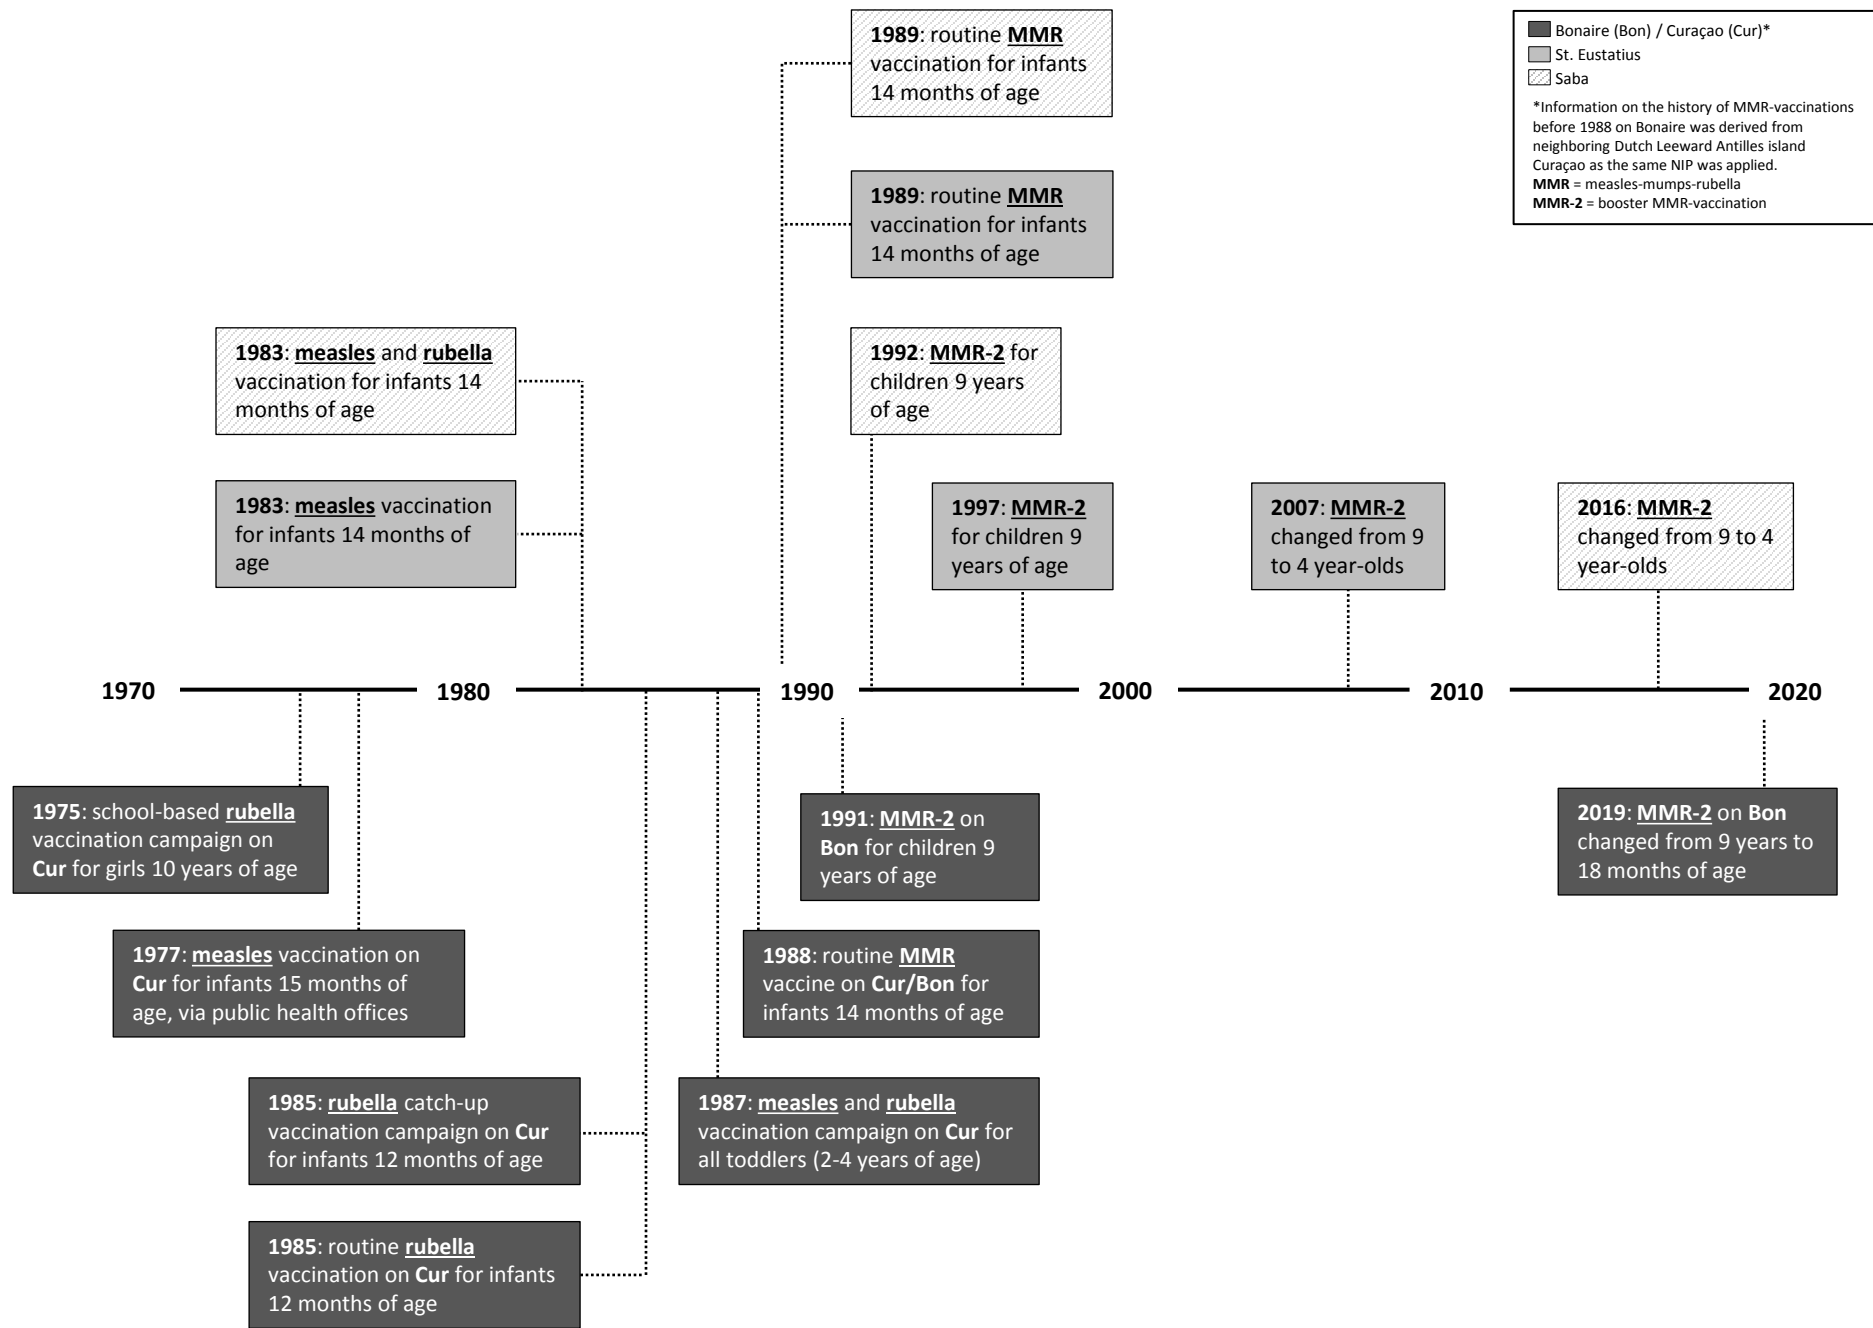

**Figure S1.** Overview of introduction and adaptations of measles, mumps and rubella (MMR)-vaccinations in Caribbean Netherlands from 1975-present.
