# Supplementary material for: Seroepidemiology of Measles, Mumps and Rubella on Bonaire, St. Eustatius and Saba: The First Population-Based Serosurveillance Study in Caribbean Netherlands
Source: MDPI journal article supplement (doi:10.3390/vaccines7040137), 2019-10-01
Supplement: s1 [file s1]

A: Measles 1 dose

$n=128$

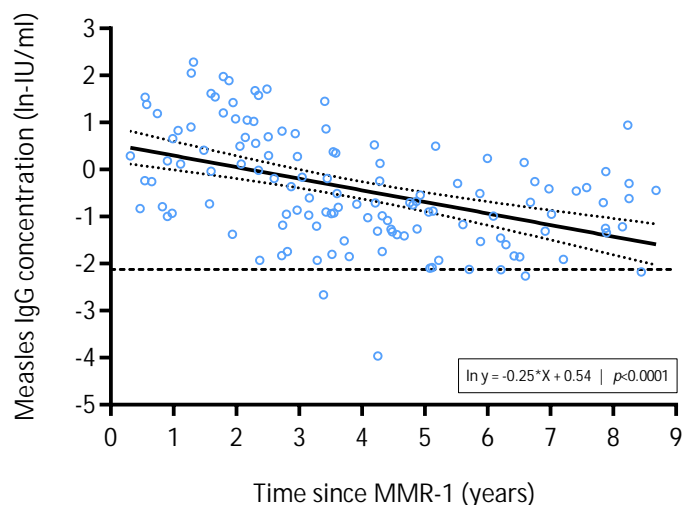

B: Measles 2 doses

$n=126$

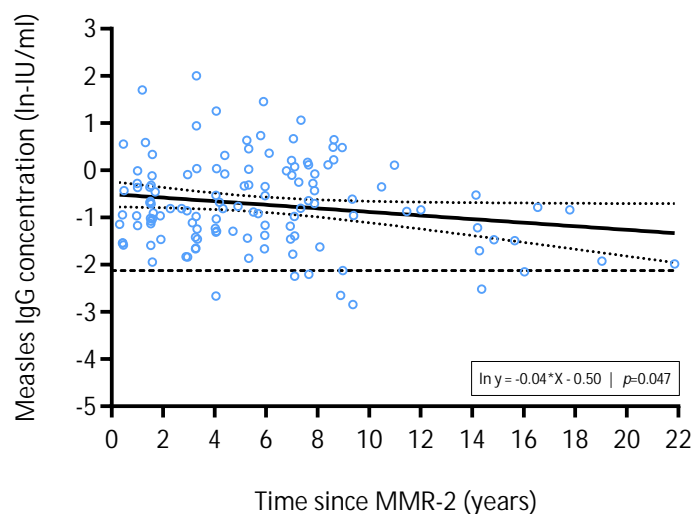

C: Mumps 1 dose

$n=125$

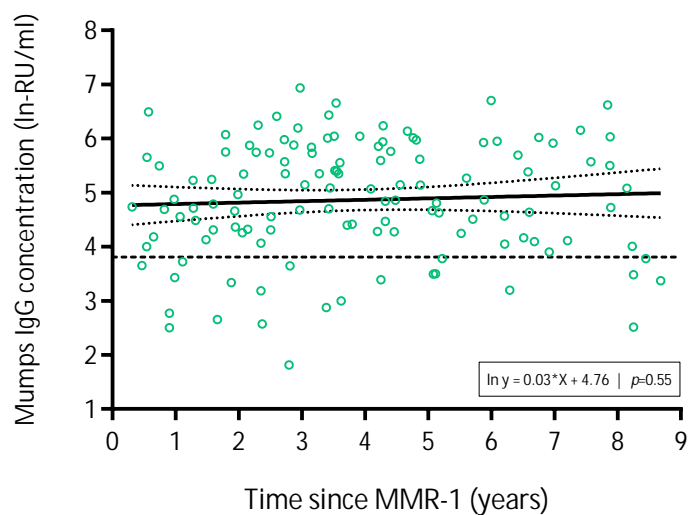

D: Mumps 2 doses

$n=124$

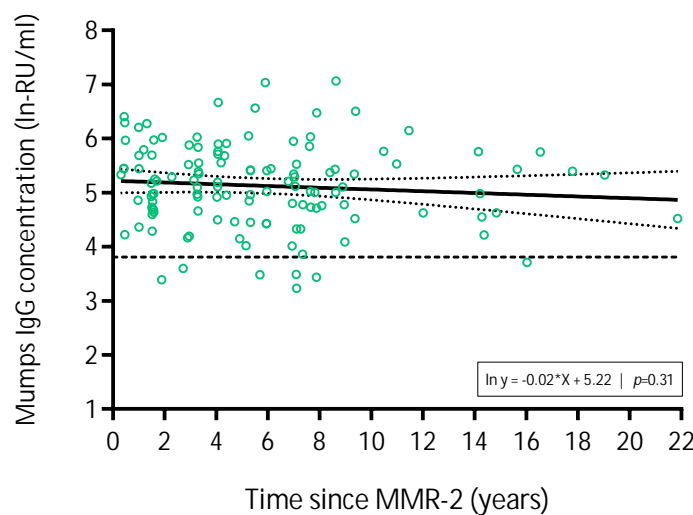

E: Rubella 1 dose

$n=128$

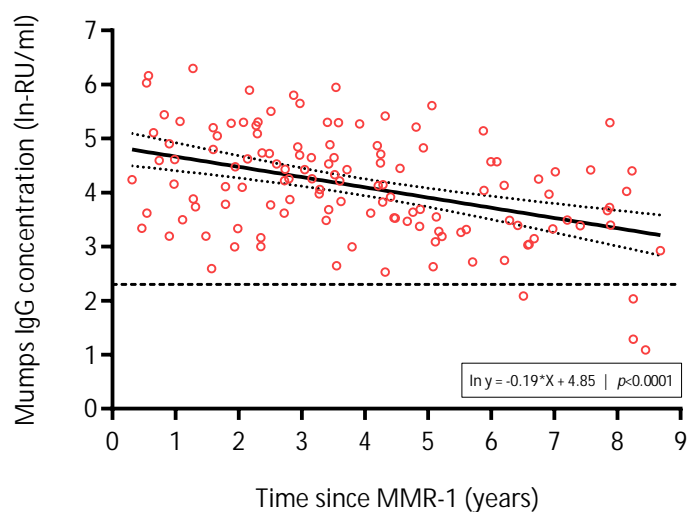

F: Rubella 2 doses

$n=126$

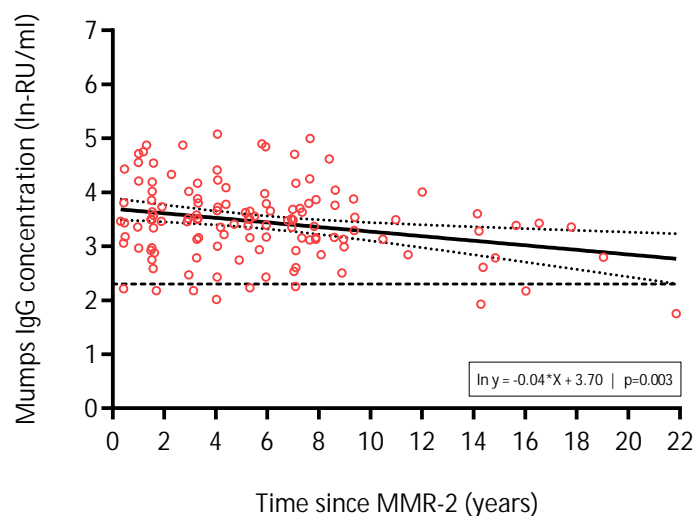

Figure S4. Persistence of measles (A & B), mumps (C & D), and rubella (E & F) IgG antibodies (ln-international units (IU) or RIVM units (RU)/ml) after one and two doses of MMR-vaccination among participants from the Dutch overseas territories. Note: the solid line represents the fitted model via linear regression analyses, the small dotted lines the 95% confidence intervals, and the dashed lines the ln-cutoff for seropositivity.
