# Supplementary material for: Seroepidemiology of Measles, Mumps and Rubella on Bonaire, St. Eustatius and Saba: The First Population-Based Serosurveillance Study in Caribbean Netherlands
Source: MDPI journal article supplement (doi:10.3390/vaccines7040137), 2019-10-01
Supplement: s1 [file s1]

## A: Measles

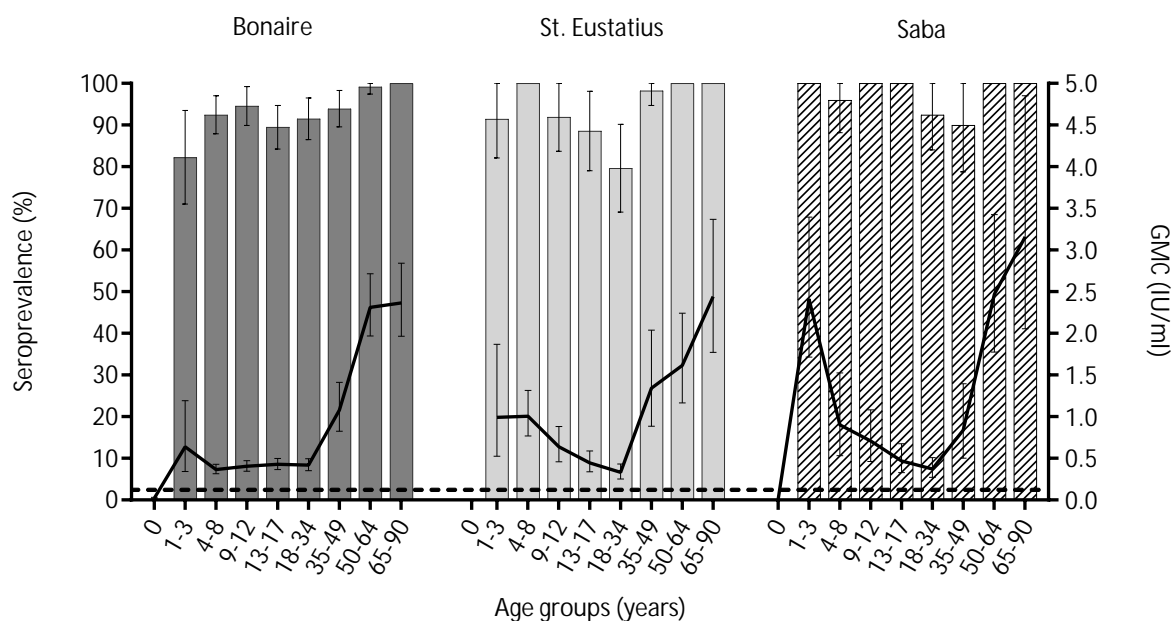

## B: Mumps

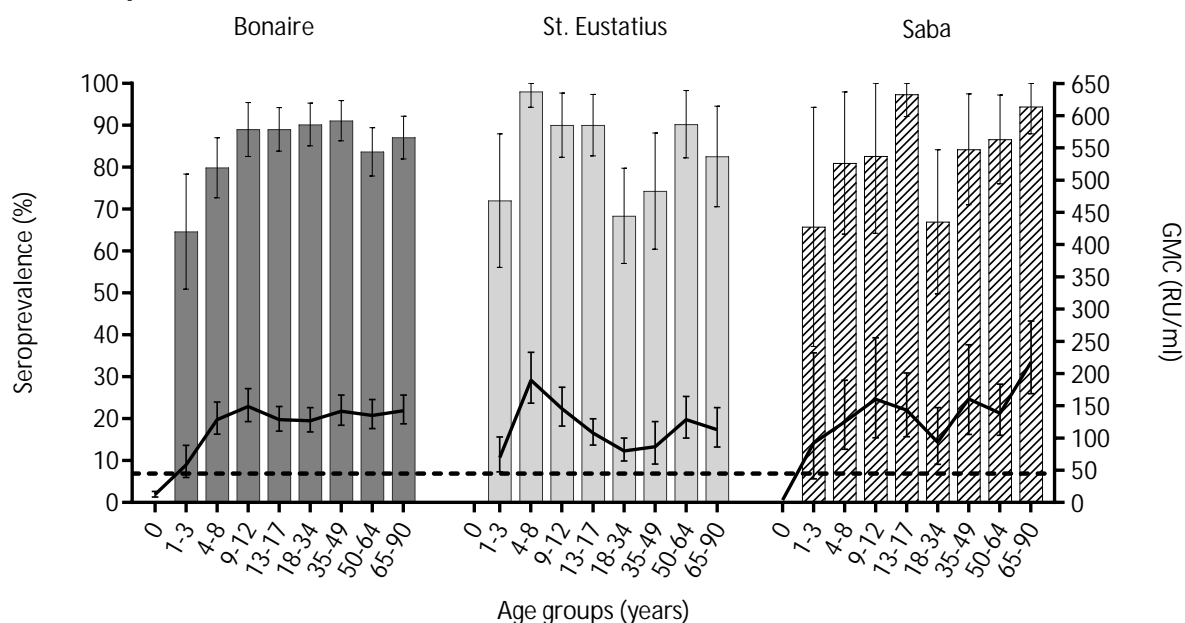

## C: Rubella

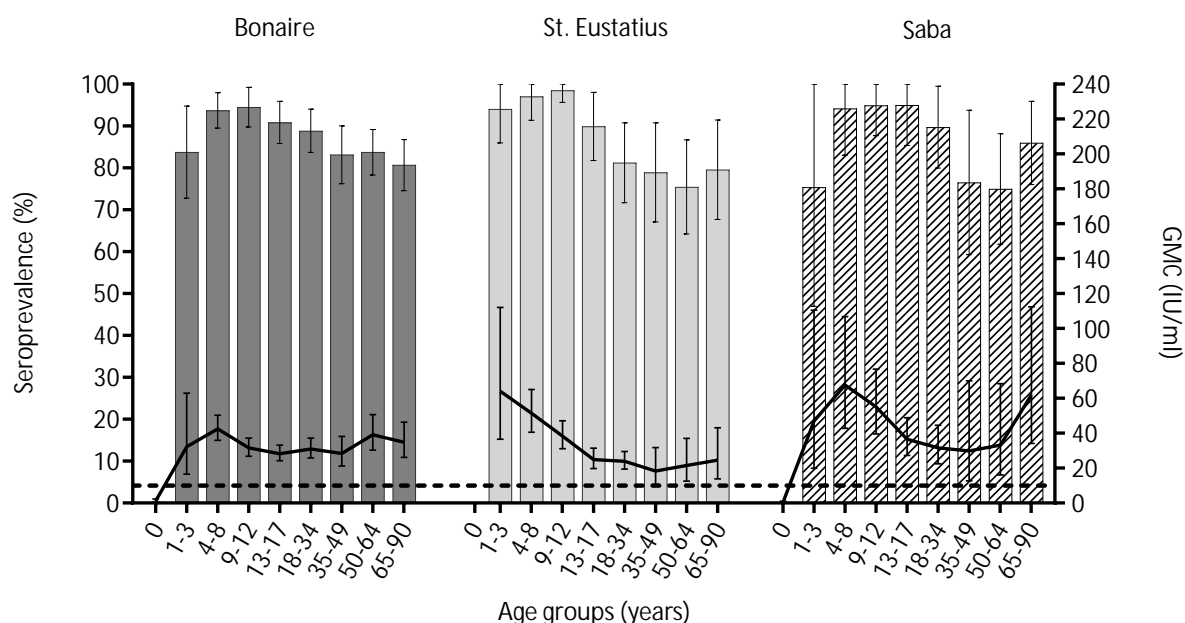

Figure S3. Age-specific seroprevalence (%) and geometric mean concentration (GMC) (with 95% confidence intervals) of measles (A), mumps (B), and rubella (C) IgG antibodies in the general population of Bonaire, St. Eustatius and Saba, 2017. Note: antibody concentrations  $\geq 0.120$  international units (IU)/ml for measles,  $\geq 45.0$  RIVM units (RU)/ml for mumps, and  $\geq 10.0$  IU/ml for rubella were considered seropositive (dashed lines).
