# Supplementary figures and images for: Seroepidemiology of Measles, Mumps and Rubella on Bonaire, St. Eustatius and Saba: The First Population-Based Serosurveillance Study in Caribbean Netherlands
Source: MDPI journal article supplement (doi:10.3390/vaccines7040137), 2019-10-01

**Figure S2.** Flowchart of the study

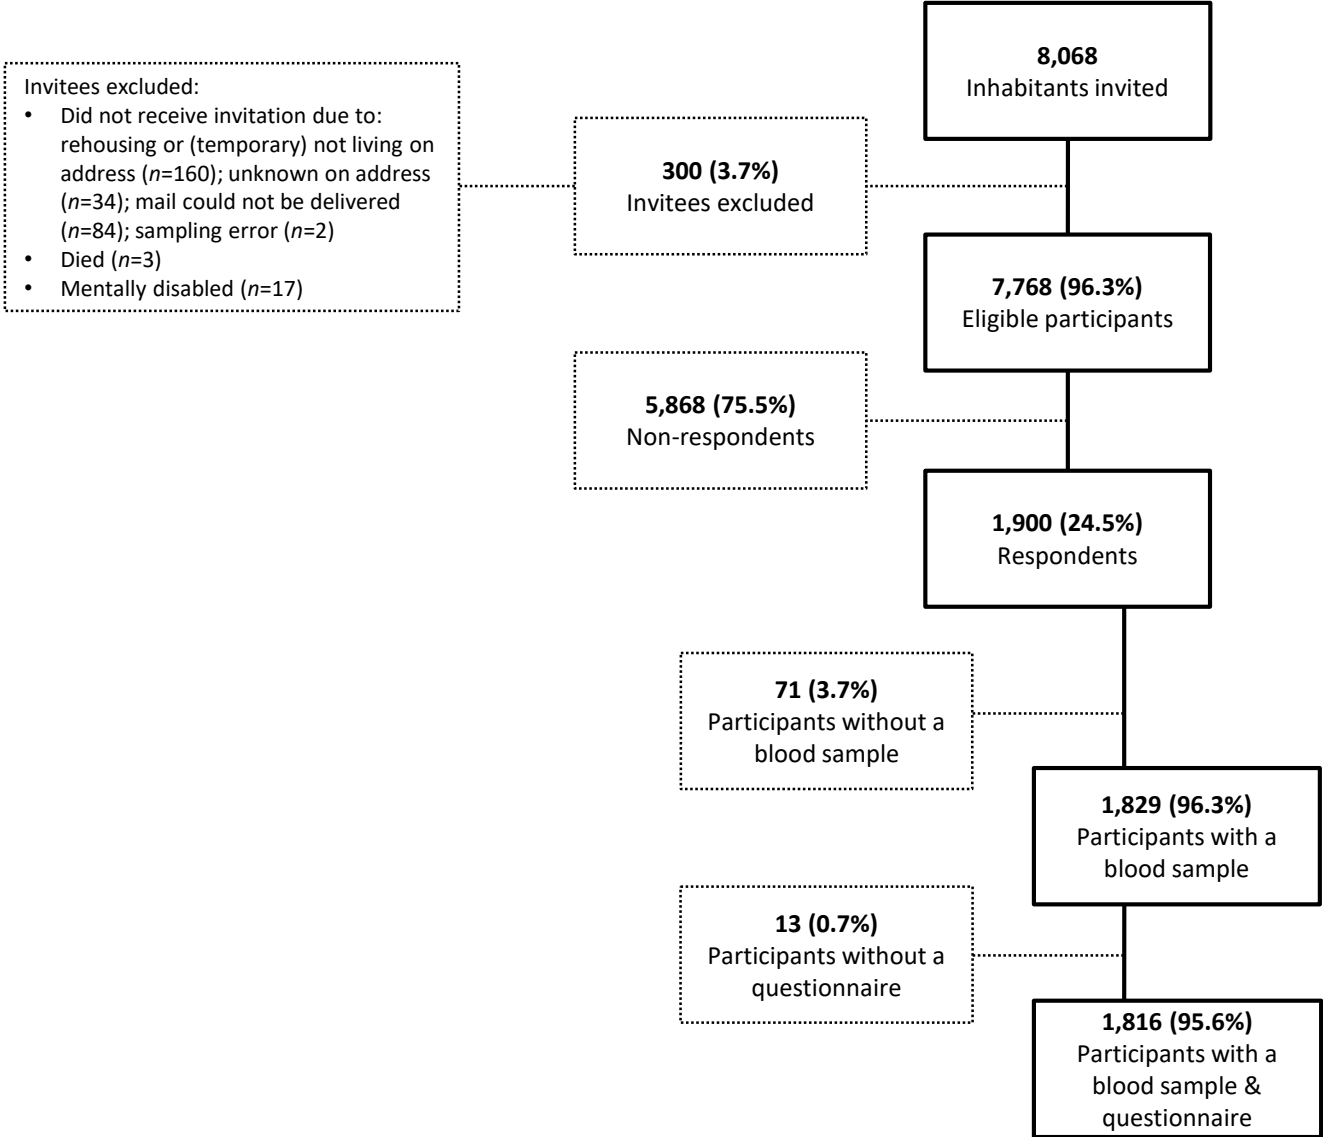

Supplement: s1 [file s1]
